# Supplementary figures and images for: Induction of apoptosis and necroptosis by 24(S)-hydroxycholesterol is dependent on activity of acyl-CoA:cholesterol acyltransferase 1
Source: PubMed Central journal article supplement — Cell Death Dis. 2014 Jan 9;5(1):e990–. doi: 10.1038/cddis.2013.524 (PMC4040651; doi:10.1038/cddis.2013.524), 2014-01-09

### A (ACAT1)

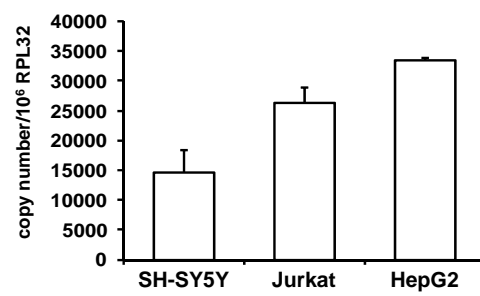

### B (ACAT2)

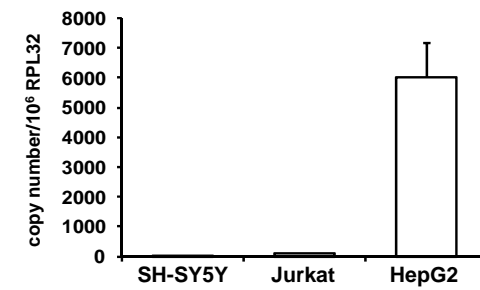

Supplement: cddis2013524x1.pdf [file cddis2013524x1.pdf]
